# Supplementary material
Source: ML conference proceedings conference paper supplement (https://proceedings.mlr.press/v84/huusari18a.html)
Supplement: Supplementary file 1 [file huusari18a-supp.pdf]

---

# Multi-view Metric Learning in Vector-valued Kernel Spaces

## Supplementary Material

---

Riikka Huusari

Hachem Kadri

Cécile Capponi

Aix Marseille Univ, Université de Toulon, CNRS, LIS, Marseille, France

## A Appendix

### A.1 MVML optimization

Here we go through the derivations of the solutions  $\mathbf{A}$ ,  $\mathbf{D}$  and  $\mathbf{w}$  for our optimization problem. The presented derivations are for the case without Nyström approximation; however the derivations with Nyström approximation are done exactly the same way.

#### Solving for $\mathbf{g}$ and $\mathbf{w}$

Let us first focus on the case where  $\mathbf{A}$  and  $\mathbf{w}$  are fixed and we solve for  $\mathbf{g}$ . We calculate the derivative of the expression in Equation (7):

$$\begin{aligned} & \frac{d}{d\mathbf{g}} \|\mathbf{y} - (\mathbf{w}^T \otimes \mathbf{I}_n) \mathbf{H} \mathbf{g}\|^2 + \lambda \langle \mathbf{g}, \mathbf{A}^\dagger \mathbf{g} \rangle \\ &= \frac{d}{d\mathbf{g}} \langle \mathbf{y}, \mathbf{y} \rangle - 2 \langle \mathbf{y}, (\mathbf{w}^T \otimes \mathbf{I}_n) \mathbf{H} \mathbf{g} \rangle \\ & \quad + \langle (\mathbf{w}^T \otimes \mathbf{I}_n) \mathbf{H} \mathbf{g}, (\mathbf{w}^T \otimes \mathbf{I}_n) \mathbf{H} \mathbf{g} \rangle + \lambda \langle \mathbf{g}, \mathbf{A}^\dagger \mathbf{g} \rangle \\ &= -2 \mathbf{H} (\mathbf{w}^T \otimes \mathbf{I}_n)^T \mathbf{y} \\ & \quad + 2 \mathbf{H} (\mathbf{w}^T \otimes \mathbf{I}_n)^T (\mathbf{w}^T \otimes \mathbf{I}_n) \mathbf{H} \mathbf{g} + 2 \lambda \mathbf{A}^\dagger \mathbf{g} \end{aligned}$$

By setting this to zero we obtain the solution

$$\mathbf{g} = (\mathbf{H} (\mathbf{w}^T \otimes \mathbf{I}_n)^T (\mathbf{w}^T \otimes \mathbf{I}_n) \mathbf{H} + \lambda \mathbf{A}^\dagger)^{-1} \mathbf{H} (\mathbf{w}^T \otimes \mathbf{I}_n)^T \mathbf{y}.$$

As for  $\mathbf{w}$  when  $\mathbf{A}$  and  $\mathbf{g}$  are fixed, we need only to consider optimizing

$$\min_{\mathbf{w}} \|\mathbf{y} - (\mathbf{w}^T \otimes \mathbf{I}_n) \mathbf{H} \mathbf{g}\|^2. \quad (19)$$

If we denote that  $\mathbf{Z} \in \mathbb{R}^{n \times v}$  is equal to reshaping  $\mathbf{H} \mathbf{g}$  by taking the elements of the vector and arranging them onto the columns of  $\mathbf{Z}$ , we obtain a following form:

$$\min_{\mathbf{w}} \|\mathbf{y} - \mathbf{Z} \mathbf{w}\|^2. \quad (20)$$

One can easily see by taking the derivative and setting it to zero that the solution for this is

$$\mathbf{w} = (\mathbf{Z}^T \mathbf{Z})^{-1} \mathbf{Z}^T \mathbf{y}. \quad (21)$$

#### Solving for $\mathbf{A}$ in (6)

When we consider  $\mathbf{g}$  (and  $\mathbf{w}$ ) to be fixed in the MVML framework (6), for  $\mathbf{A}$  we have the following minimization problem:

$$\min_{\mathbf{A}} \lambda \langle \mathbf{g}, \mathbf{A}^\dagger \mathbf{g} \rangle + \eta \|\mathbf{A}\|_F^2$$

Derivating this with respect to  $\mathbf{A}$  gives us

$$\begin{aligned} & \frac{d}{d\mathbf{A}} \lambda \langle \mathbf{g}, \mathbf{A}^\dagger \mathbf{g} \rangle + \eta \|\mathbf{A}\|_F^2 \\ &= \frac{d}{d\mathbf{A}} \lambda \langle \mathbf{g}, \mathbf{A}^\dagger \mathbf{g} \rangle + \eta \operatorname{tr}(\mathbf{A} \mathbf{A}) \\ &= -\lambda \mathbf{A}^\dagger \mathbf{g} \mathbf{g}^T \mathbf{A}^\dagger + 2\eta \mathbf{A} \end{aligned}$$

Thus the gradient descent step will be

$$\mathbf{A}^{k+1} = (1 - 2\mu\eta) \mathbf{A}^k + \mu\lambda (\mathbf{A}^k)^\dagger \mathbf{g} \mathbf{g}^T (\mathbf{A}^k)^\dagger$$

when moving to the direction of negative gradient with step size  $\mu$ .

#### Solving for $\mathbf{A}$ in (11)

To solve  $\mathbf{A}$  from equation (11) we use proximal minimization. Let us recall the optimization problem after the change of the variable:

$$\begin{aligned} & \min_{\mathbf{A}, \mathbf{g}, \mathbf{w}} \|\mathbf{y} - (\mathbf{w}^T \otimes \mathbf{I}_n) \mathbf{H} \mathbf{g}\|^2 + \lambda \langle \mathbf{g}, \mathbf{A}^\dagger \mathbf{g} \rangle \\ & \quad + \eta \sum_{\gamma \in \mathcal{G}} \|\mathbf{A}_\gamma\|_F, \end{aligned}$$

and denote

$$h(\mathbf{A}) = \lambda \langle \mathbf{g}, \mathbf{A}^\dagger \mathbf{g} \rangle$$

and

$$\Omega(\mathbf{A}) = \eta \sum_{\gamma \in \mathcal{G}} \|\mathbf{A}_\gamma\|_F$$

for the two terms in our optimization problem that contain the matrix  $\mathbf{A}$ .

---

<sup>7</sup>Matrix cookbook (Equation 61): <https://www.math.uwaterloo.ca/~hwolkowi/matrixcookbook.pdf>.

Without going into detailed theory of proximal operators and proximal minimization, we remark that the proximal minimization algorithm update takes the form

$$\mathbf{A}^{k+1} = \mathbf{prox}_{\mu^k \Omega}(\mathbf{A}^k - \mu^k \nabla h(\mathbf{A}^k)).$$

It is well-known that in traditional group-lasso situation the proximal operator is

$$[\mathbf{prox}_{\mu^k \Omega}(\mathbf{z})]_\gamma = \left(1 - \frac{\eta}{\|\mathbf{z}_\gamma\|_2}\right)_+ \mathbf{z}_\gamma,$$

where  $\mathbf{z}$  is a vector and  $+$  denotes the maximum of zero and the value inside the brackets. In our case we are solving for a matrix, but due to the equivalence of Frobenious norm to vector 2-norm we can use this exact same operator. Thus we get as the proximal update

$$[\mathbf{A}^{k+1}]_\gamma = \left(1 - \frac{\eta}{\|[\mathbf{A}^k - \mu^k \nabla h(\mathbf{A}^k)]_\gamma\|_F}\right)_+ [\mathbf{A}^k - \mu^k \nabla h(\mathbf{A}^k)]_\gamma,$$

where

$$\nabla h(\mathbf{A}^k) = -\lambda(\mathbf{A}^k)^{-1} \mathbf{g} \mathbf{g}^T (\mathbf{A}^k)^{-1}.$$

We can see from the update formula and the derivative that if  $\mathbf{A}^k$  is a positive matrix, the update without block-multiplication,  $\mathbf{A}^k - \mu^k \nabla h(\mathbf{A}^k)$ , will be positive, too. This is unfortunately not enough to guarantee the general positivity of  $\mathbf{A}^{k+1}$ . However we note that it is, indeed, positive if it is block-diagonal, and in general whenever a matrix of the multipliers  $\alpha$

$$\alpha_{st} = \left(1 - \frac{\eta}{\|[\mathbf{A}^k - \mu^k \nabla h(\mathbf{A}^k)]_{st}\|_2}\right)_+$$

is positive, then  $\mathbf{A}^{k+1}$  is, too (see [12] for reference - this is a blockwise Hadamard product where the blocks commute).

## A.2 Proof of Theorem 1

**Theorem 1.** *Let  $\mathcal{H}$  be a vector-valued RKHS associated with the multi-view kernel  $K$  defined by Equation 4. Consider the hypothesis class  $\mathcal{H}_\lambda = \{x \mapsto f_{u, \mathbf{A}}(x) = \Gamma_{\mathbf{A}}(x)^* u : \mathbf{A} \in \Delta, \|u\|_{\mathcal{H}} \leq \beta\}$ , with  $\Delta = \{\mathbf{A} : \mathbf{A} \succ 0, \|\mathbf{A}\|_F \leq \alpha\}$ . The empirical Rademacher complexity of  $\mathcal{H}_\lambda$  can be upper bounded as follows:*

$$\hat{\mathcal{R}}_n(\mathcal{H}_\lambda) \leq \frac{\beta \sqrt{\alpha \|q\|_1}}{n},$$

where  $q = (\text{tr}(\mathbf{K}_l^2))_{l=1}^v$ , and  $\mathbf{K}_l$  is the Gram matrix computed from the training set  $\{x_1, \dots, x_n\}$  with the kernel  $k_l$  defined on the view  $l$ . For kernels  $k_l$  such that  $\text{tr}(\mathbf{K}_l^2) \leq \tau n$ , we have

$$\hat{\mathcal{R}}_n(\mathcal{H}_\lambda) \leq \beta \sqrt{\frac{\alpha \tau v}{n}}.$$

*Proof.* We start by recalling that the feature map associated to the operator-valued kernel  $K$  is the mapping  $\Gamma : \mathcal{X} \rightarrow \mathcal{L}(\mathcal{Y}, \mathcal{H})$ , where  $\mathcal{X}$  is the input space,  $\mathcal{Y} = \mathbb{R}^v$ , and  $\mathcal{L}(\mathcal{Y}, \mathcal{H})$  is the set of bounded linear operators from  $\mathcal{Y}$  to  $\mathcal{H}$  (see, e.g., [19, 7] for more details). It is known that  $K(x, z) = \Gamma(x)^* \Gamma(z)$ . We denote by  $\Gamma_{\mathbf{A}}$  the feature map associated to our multi-view kernel (Equation 4). We also define the matrix  $\Sigma = (\sigma)_{i=1}^n \in \mathbb{R}^{nv}$

$$\begin{aligned} \hat{\mathcal{R}}_n(\mathcal{H}_\lambda) &= \frac{1}{n} \mathbb{E} \left[ \sup_{f \in \mathcal{H}} \sup_{\mathbf{A} \in \Delta} \sum_{i=1}^n \sigma_i^\top f_{u, \mathbf{A}}(x_i) \right] \\ &= \frac{1}{n} \mathbb{E} \left[ \sup_u \sup_{\mathbf{A}} \sum_{i=1}^n \langle \sigma_i, \Gamma_{\mathbf{A}}(x_i)^* u \rangle_{\mathbb{R}^v} \right] \\ &= \frac{1}{n} \mathbb{E} \left[ \sup_u \sup_{\mathbf{A}} \sum_{i=1}^n \langle \Gamma_{\mathbf{A}}(x_i) \sigma_i, u \rangle_{\mathcal{H}} \right] \quad (1) \end{aligned}$$

$$\leq \frac{\beta}{n} \mathbb{E} \left[ \sup_{\mathbf{A}} \left\| \sum_{i=1}^n \Gamma_{\mathbf{A}}(x_i) \sigma_i \right\|_{\mathcal{H}} \right] \quad (2)$$

$$= \frac{\beta}{n} \mathbb{E} \left[ \sup_{\mathbf{A}} \left( \sum_{i,j=1}^n \langle \sigma_i, K_{\mathbf{A}}(x_i, x_j) \sigma_j \rangle_{\mathbb{R}^v} \right)^{\frac{1}{2}} \right] \quad (3)$$

$$= \frac{\beta}{n} \mathbb{E} \left[ \sup_{\mathbf{A}} (\langle \Sigma, \mathbf{K}_{\mathbf{A}} \Sigma \rangle_{\mathbb{R}^{nv}})^{1/2} \right]$$

$$= \frac{\beta}{n} \mathbb{E} \left[ \sup_{\mathbf{A}} \langle \Sigma, \mathbf{H} \mathbf{A} \mathbf{H} \Sigma \rangle^{1/2} \right]$$

$$= \frac{\beta}{n} \mathbb{E} \left[ \sup_{\mathbf{A}} \text{tr}(\mathbf{H} \Sigma \Sigma^\top \mathbf{H} \mathbf{A})^{1/2} \right]$$

$$\leq \frac{\beta}{n} \mathbb{E} \left[ \sup_{\mathbf{A}} \text{tr}([\mathbf{H} \Sigma \Sigma^\top \mathbf{H}]^2)^{1/4} \text{tr}(\mathbf{A}^2)^{1/4} \right] \quad (4)$$

$$\leq \frac{\beta}{n} \mathbb{E} \left[ \sup_{\mathbf{A}} \text{tr}(\mathbf{H}^2 \Sigma \Sigma^\top)^{1/2} \text{tr}(\mathbf{A}^2)^{1/4} \right]$$

$$\leq \frac{\beta \sqrt{\alpha}}{n} \mathbb{E} \left[ \sup_{\mathbf{A}} \text{tr}(\mathbf{H}^2 \Sigma \Sigma^\top)^{1/2} \right]$$

$$= \frac{\beta \sqrt{\alpha}}{n} \mathbb{E} \left[ \text{tr}(\mathbf{H}^2 \Sigma \Sigma^\top)^{1/2} \right]$$

$$\leq \frac{\beta \sqrt{\alpha}}{n} \left( \mathbb{E} \left[ \text{tr}(\mathbf{H}^2 \Sigma \Sigma^\top) \right] \right)^{1/2} \quad (5)$$

$$= \frac{\beta \sqrt{\alpha}}{n} \left( \text{tr} \left[ \mathbf{H}^2 \mathbb{E}(\Sigma \Sigma^\top) \right] \right)^{1/2}$$

$$= \frac{\beta \sqrt{\alpha}}{n} \sqrt{\|(\text{tr}(\mathbf{K}_1^2), \dots, \text{tr}(\mathbf{K}_v^2))\|_1}.$$

Here (1) and (3) are obtained with reproducing property, (2) and (4) with Cauchy-Schwarz inequality, and (5) with Jensen's inequality. The last equality follows from the fact that  $\text{tr}(\mathbf{H}^2) = \sum_{l=1}^v \text{tr}(\mathbf{K}_l^2)$ . For kernels  $k_l$  that satisfy  $\text{tr}(\mathbf{K}_l^2) \leq \tau n$ ,  $l = 1, \dots, v$ , we obtain that

$$\hat{\mathcal{R}}_n(\mathcal{H}_\lambda) \leq \beta \sqrt{\frac{\alpha \tau v}{n}}. \quad \square$$
